# Supplementary material
Source: ML conference proceedings conference paper supplement (https://openaccess.thecvf.com/content/ICCV_2017/html/Xu_Estimating_Defocus_Blur_ICCV_2017_paper.html)
Supplement: Supplementary file 1 [file Xu_Estimating_Defocus_Blur_ICCV_2017_supplemental.pdf]

# Supplementary Materials of "Estimating Defocus Blur via Rank of Local Patches"

Guodong Xu<sup>1</sup>, Yuhui Quan<sup>2</sup>, Hui Ji<sup>1</sup>

<sup>1</sup>Department of Mathematics, National University of Singapore, Singapore 119076

<sup>2</sup>School of Computer Science & Engineering, South China University of Technology, Guangzhou 510006, China

{a0109978@u.nus.edu, csyhquan@scut.edu.cn, matjh@nus.edu.sg}

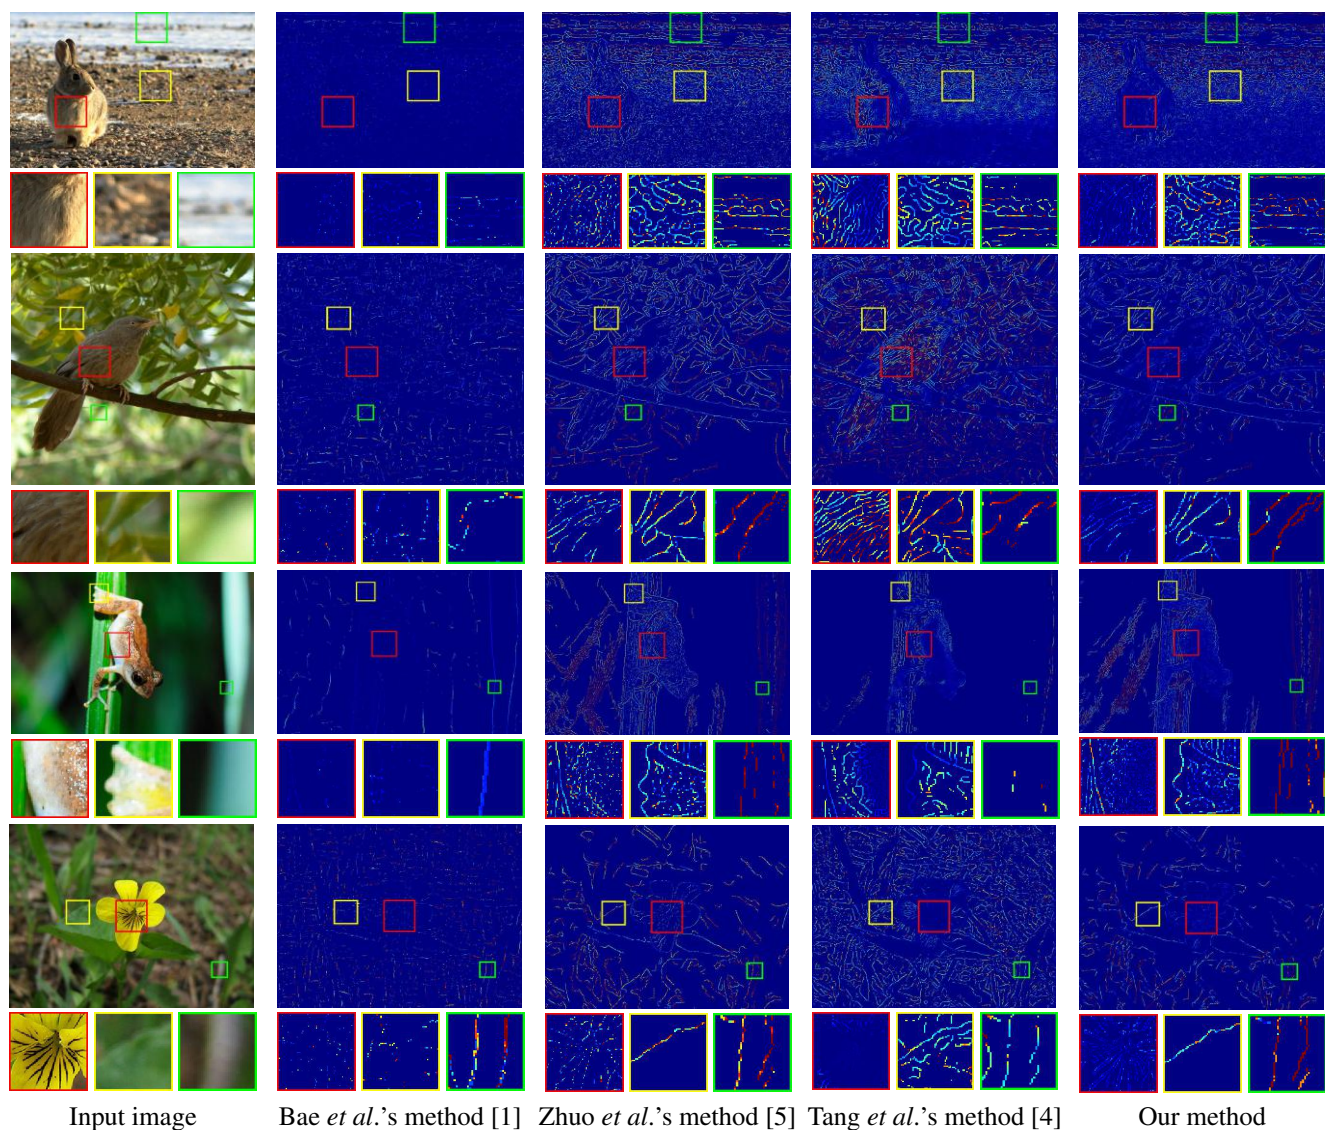

Figure 1: Defocus map estimation on edges points of four additional sample images.



### 1. Full defocus map estimation of additional test images by several test methods

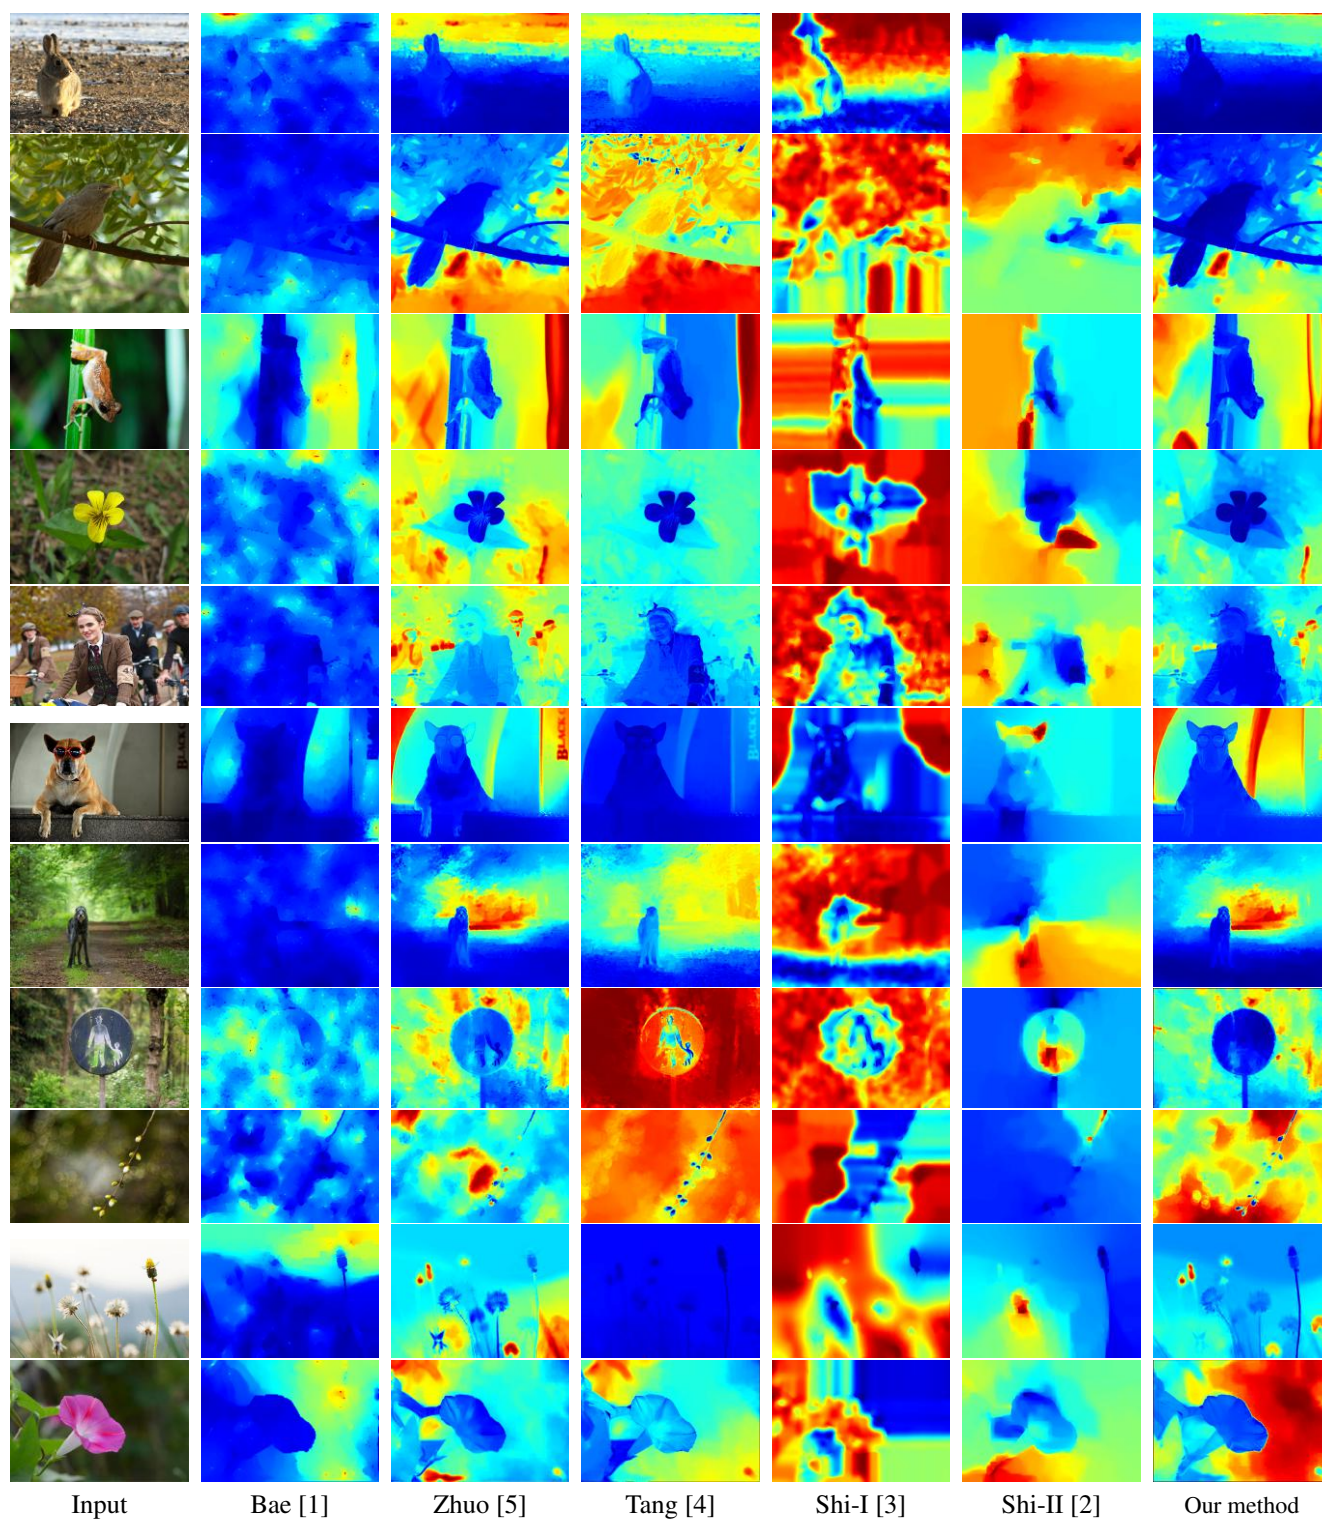



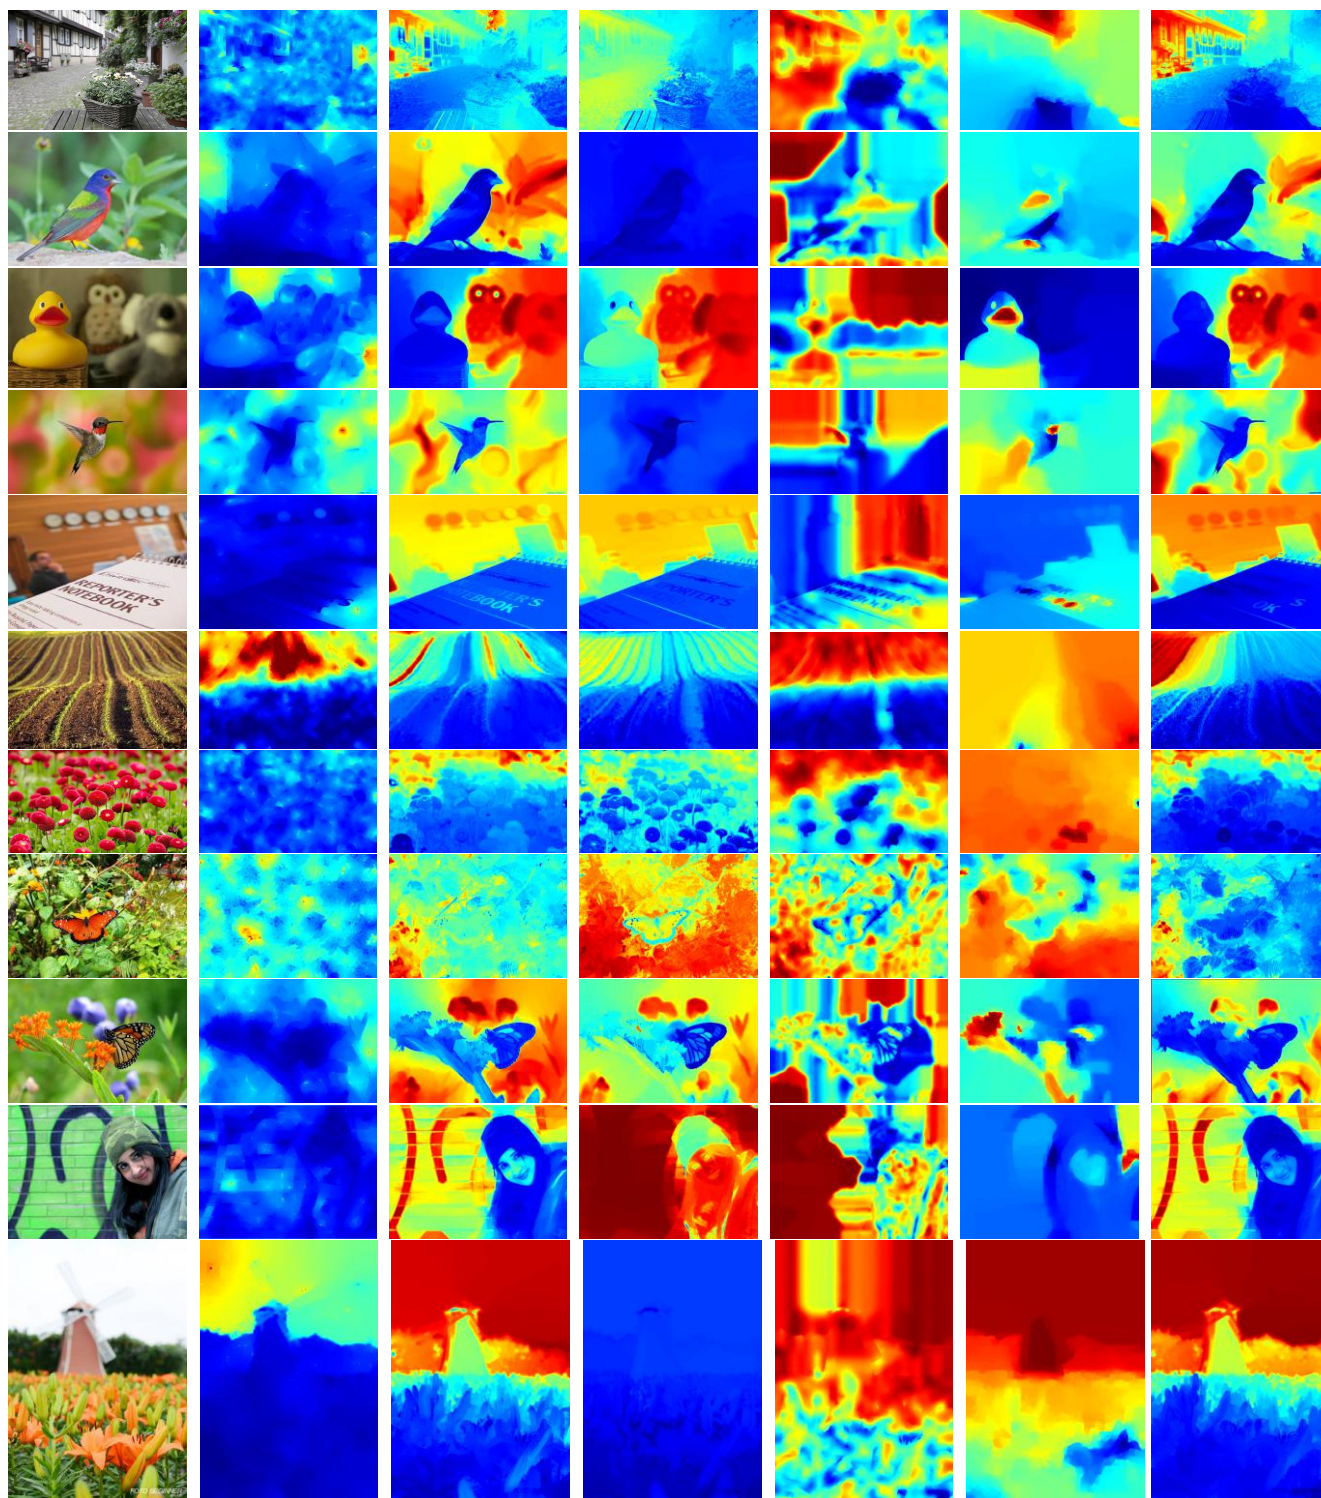

Input

Bae [1]

Zhuo [5]

Tang [4]

Shi-I [3]

Shi-II [2]

Ours



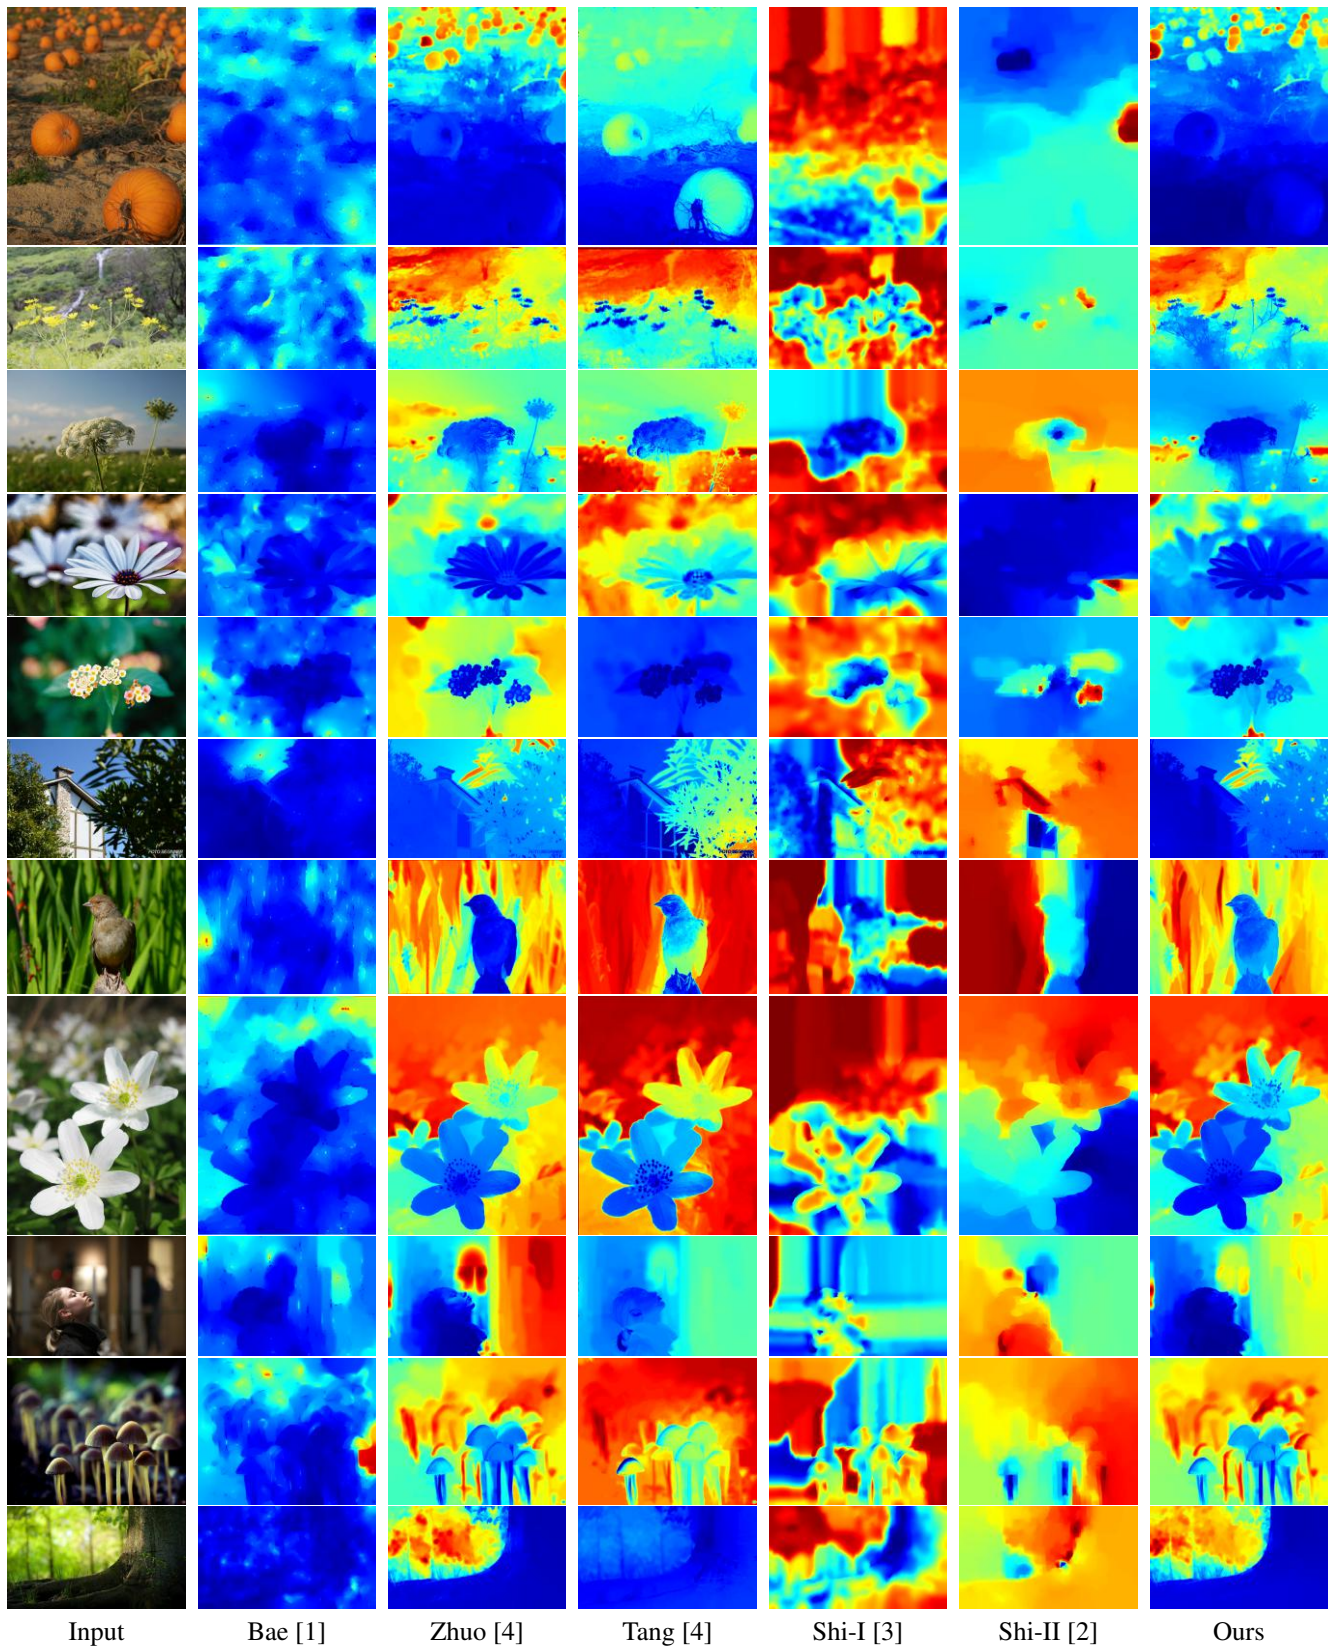

Figure 2: Defocus map estimation of additional real images by several test methods, the defocus map is normalized to  $[0, 1]$ .

## References

- [1] S. Bae and F. Durand. Defocus magnification. In *CGF*, volume 26, pages 571–579. Wiley Online Library, 2007.
- [2] J. Shi, X. Tao, L. Xu, and J. Jia. Break ames room illusion: depth from general single images. *TOG*, 34(6):225, 2015.
- [3] J. Shi, L. Xu, and J. Jia. Just noticeable defocus blur detection and estimation. In *CVPR*, pages 657–665. IEEE, 2015.
- [4] C. Tang, C. Hou, and Z. Song. Defocus map estimation from a single image via spectrum contrast. *Optics Letters*, 38(10):1706–1708, 2013.
- [5] S. Zhuo and T. Sim. Defocus map estimation from a single image. *PR*, 44(9):1852–1858, 2011.
